# Supplementary material for: Dataset from fundus images for the study of diabetic retinopathy
Source: PubMed Central journal article supplement (PMC8257963; doi:10.1016/j.dib.2021.107068), 2021-04-21
Supplement: mmc1.pdf [file mmc1.pdf]

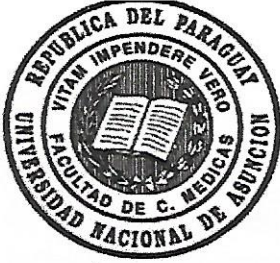

**UNIVERSIDAD NACIONAL DE ASUNCIÓN**  
**FACULTAD DE CIENCIAS MÉDICAS**  
**CÁTEDRA Y SERVICIO DE OFTALMOLOGÍA**

Mariscal López e/ Cruzada de la Amistad – San Lorenzo

E-mail: oftalmologia@med.una.py

Tel: (0595 021) 683 930/2 Interno 298 y 115

San Lorenzo, 24 de marzo de 2021.-

*Mrs.*  
*Engr. Vanessa Cañete*  
*INCADE S.A./ UNIVERSIDAD AMERICANA*

I'am pleased to announce the authorization for the acquisition, processing, analysis and subsequent scientific publication of retinography images of our services, obtained with the ZEISS VISUCAM 500 equipment belonging to the "Cátedra de Oftalmología del Hospital de Clínicas", within the framework of the project awarded by the CONACYT under the code: PINV18-846 Automatic detection of diabetic retinopathy using neuro-evolutionary algorithms.

Kind regards

Prof. Dr. Jorge E. Carrón  
Oftalmólogo - Cirujano  
Reg. Prof. 1567

---

**Prof. Dr. Jorge E. Carrón, Jefe Interino**  
**Cátedra de Oftalmología**  
**Facultad de Ciencias Médicas**  
**Universidad Nacional de Asunción**
